# Supplementary material for: The activation of ezrin–radixin–moesin proteins is regulated by netrin-1 through Src kinase and RhoA/Rho kinase activities and mediates netrin-1–induced axon outgrowth
Source: PubMed Central journal article supplement — Mol Biol Cell. 2011 Oct 1;22(19):3734–46. doi: 10.1091/mbc.E10-11-0917 (PMC3183026; doi:10.1091/mbc.e10-11-0917), 2011-10-01
Supplement: supp_E10-11-0917_CombinedSupMats.pdf [file supp_E10-11-0917_CombinedSupMats.pdf]

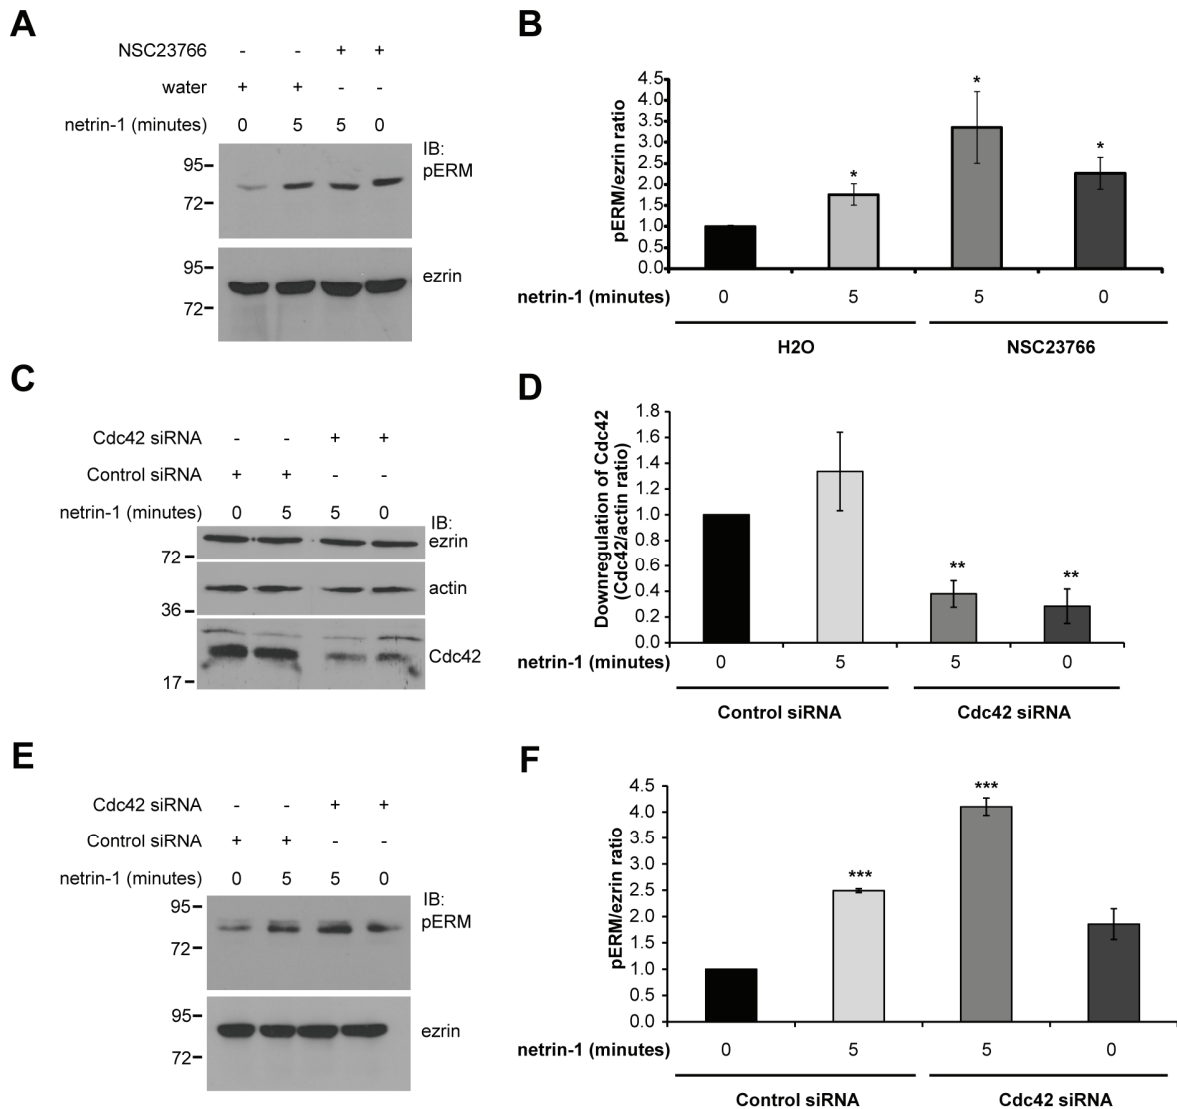

**Supplemental Figure 1. Netrin-1-dependent ERM phosphorylation is not blocked by Rac1 inhibition or Cdc42 downregulation.**

Embryonic rat cortical neurons (E18, 2DIV) were incubated with netrin-1 for the indicated times following treatment with either: (A and B) Rac1 inhibitor NSC23766 or water as a negative control or (C-F) Cdc42 siRNA or Control Negative siRNA electroporation. Protein lysates were resolved by SDS-PAGE and immunoblotted with anti-pERM, -ezrin, -actin, or -Cdc42 antibodies. (D) Quantitative densitometry of Cdc42 downregulation is represented as the ratio of Cdc42 over actin. Cdc42 expression is downregulated by at least 62%. (F) Quantitative densitometry is represented as the ratio of pERM over total ezrin and corresponds to the average of at least three independent experiments. Error bars represent SEM (\* $p < 0.05$ , \*\* $p < 0.01$ , \*\*\* $p < 0.005$ ).

**A**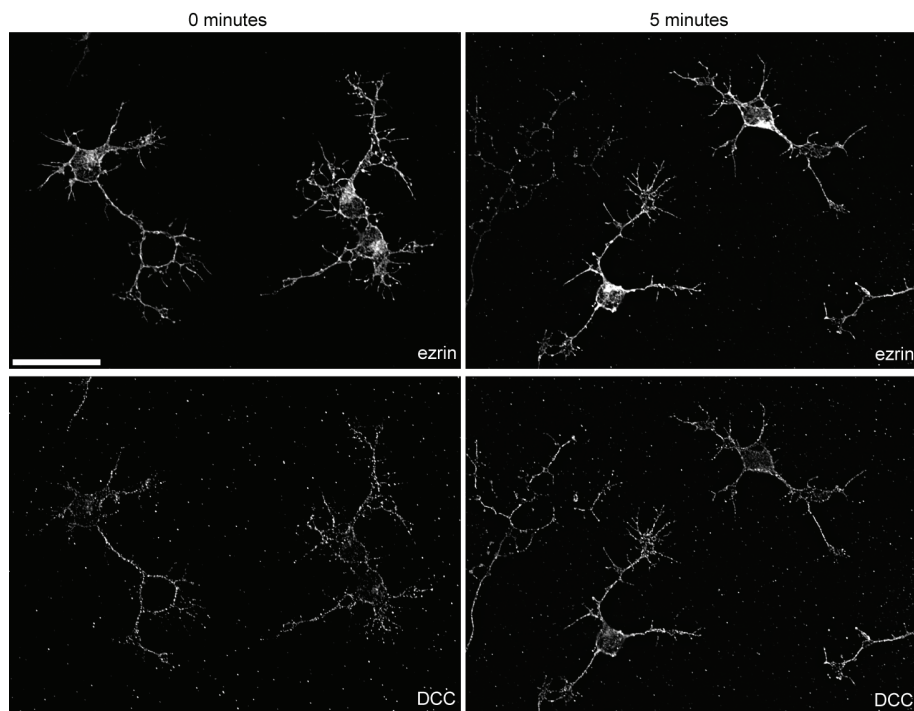**B**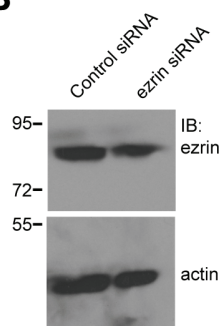**C**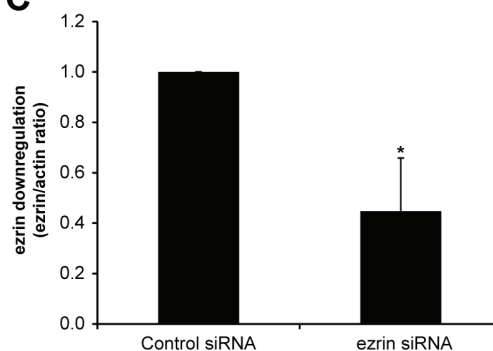

**Supplemental Figure 2.** Subcellular localization and downregulation of ezrin in cortical neurons.

(A) Embryonic rat cortical neurons (E18, 2DIV) were incubated with netrin-1 for 0 or 5 minutes, fixed and immunostained with antibodies against DCC and ezrin. Scale bar, 5  $\mu$ m. Total ezrin proteins, unlike phosphorylated ERM proteins, do not accumulate in growth cones following netrin-1 stimulation. (B) Embryonic rat cortical neurons were electroporated with Negative Control or ezrin siRNA and protein lysates were resolved by SDS-PAGE and immunoblotted with anti-ezrin and -actin antibodies. (C) Quantitative densitometry of ezrin downregulation in (B) is represented as the ratio of ezrin over actin. Ezrin expression is downregulated by 55%. Error bars represent SEM (\* $p < 0.05$ ).

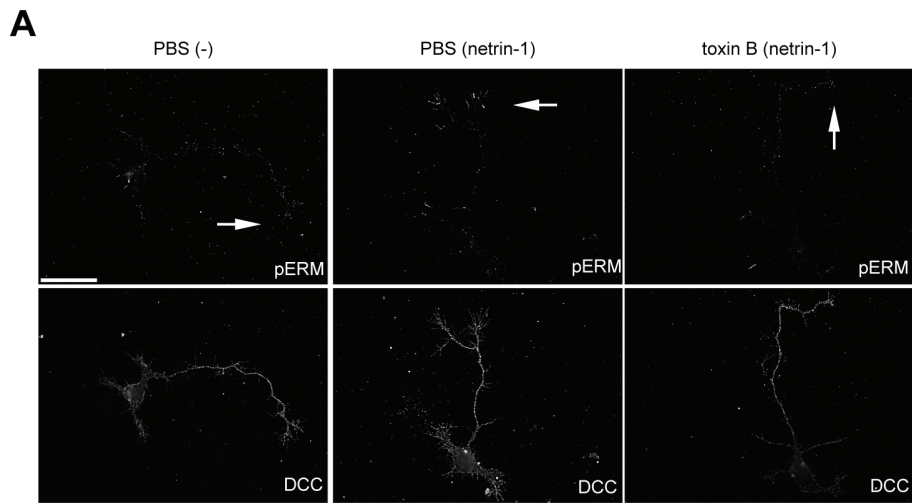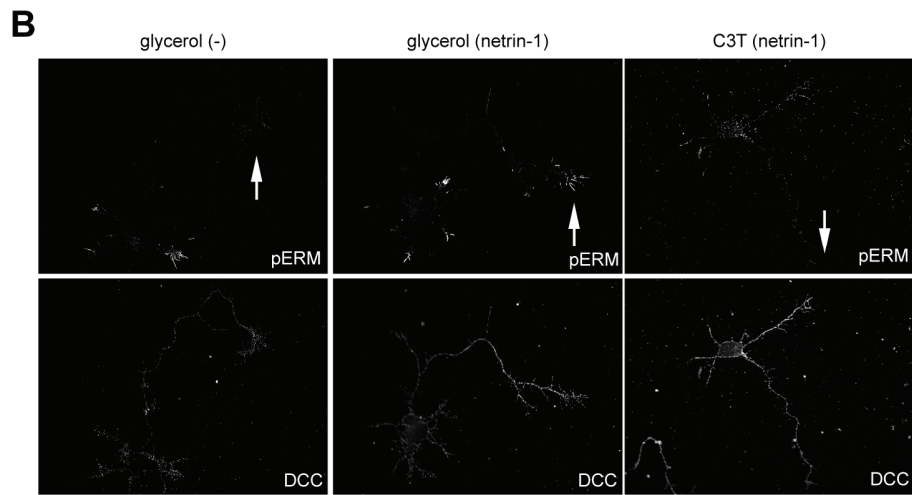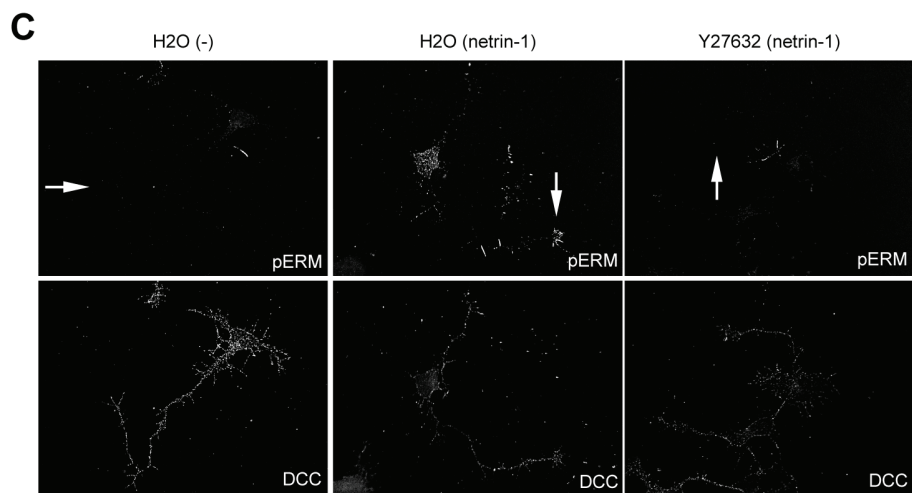

**Supplemental Figure 3.** Toxin B, C3 transferase and Y27632 inhibit netrin-1-induced accumulation of phosphorylated ERM proteins in growth cones.

Embryonic rat cortical neurons (E18, 2DIV) were incubated with netrin-1 for 0 or 5 minutes following treatment with either: (A) Rho GTPase inhibitor toxin B or PBS as a negative control, (B) RhoA inhibitor C3 Transferase (C3T) or glycerol as a negative control or (C) Rho kinase inhibitor Y27632 or water (H<sub>2</sub>O) as a negative control. Neurons were fixed and immunostained with anti-pERM and -DCC antibodies. The quantification of the accumulation of phosphorylated ERM proteins (pERM) in growth cones (arrows) is represented in Figure 6. Scale bar, 5  $\mu$ m.
